# Supplementary material for: Development and validation of a decision tree model for prediction of insomnia risk among ischemic stroke convalescence patients
Source: Research Square preprint supplement (doi:10.21203/rs.3.rs-6248505/v1), 2025-04-17

**Funding 1. The Jilin Province Science and Technology Development Plan Project (Grant No. 232662SF0103109942)**


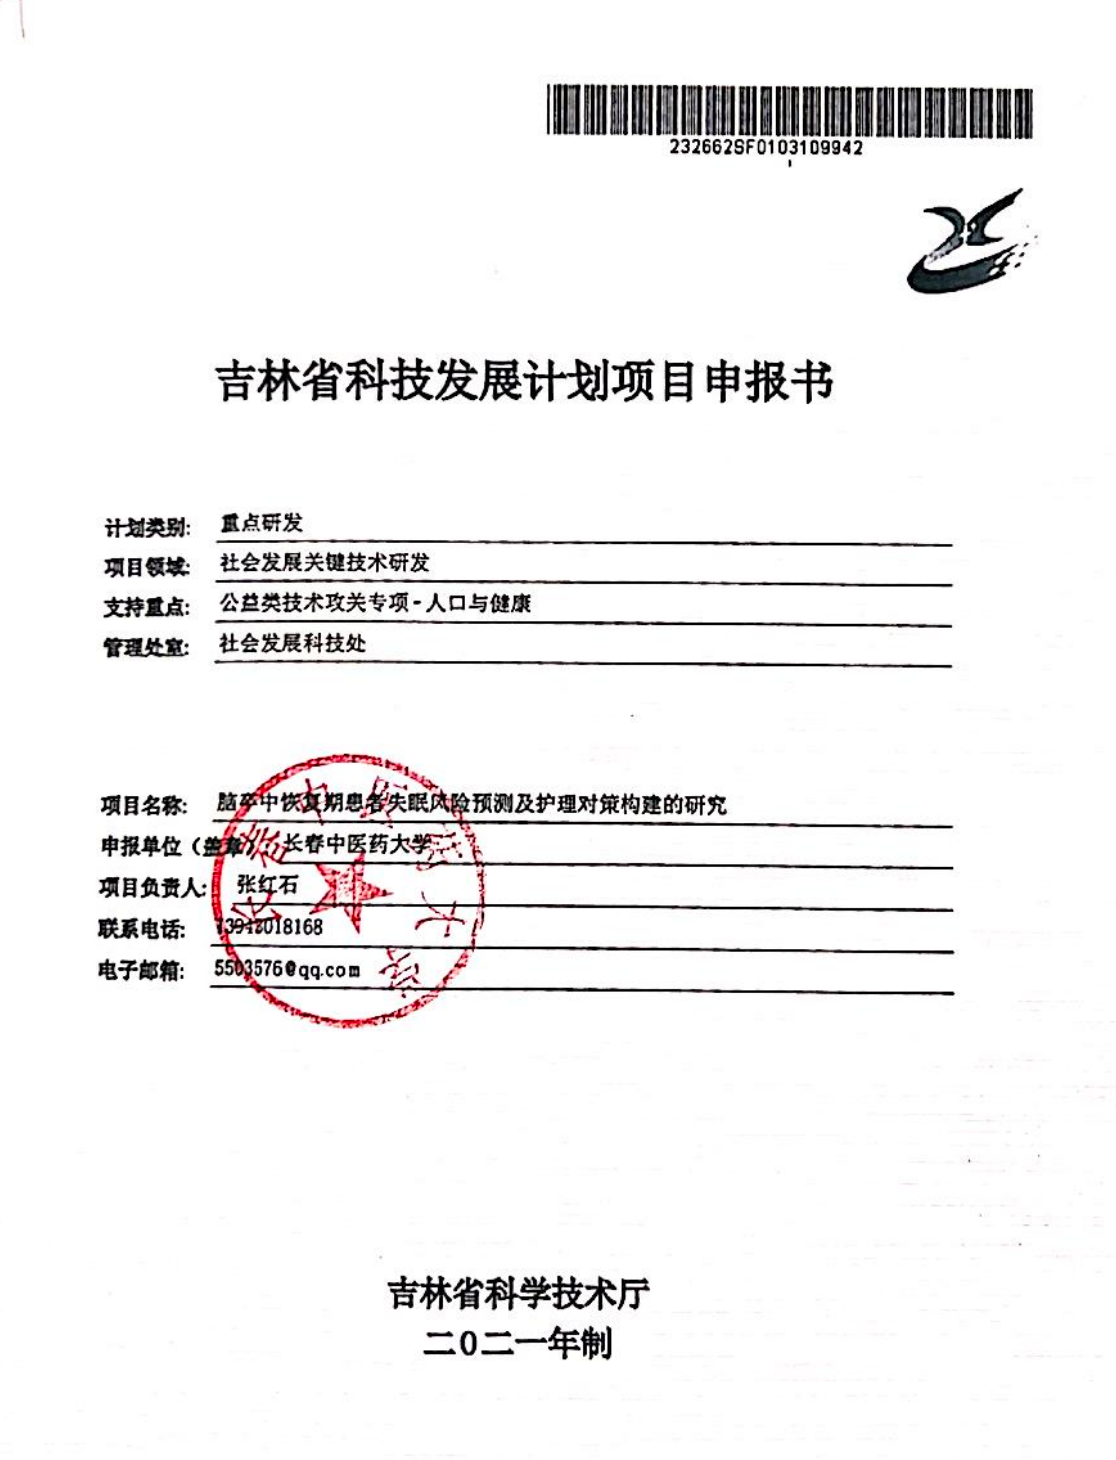


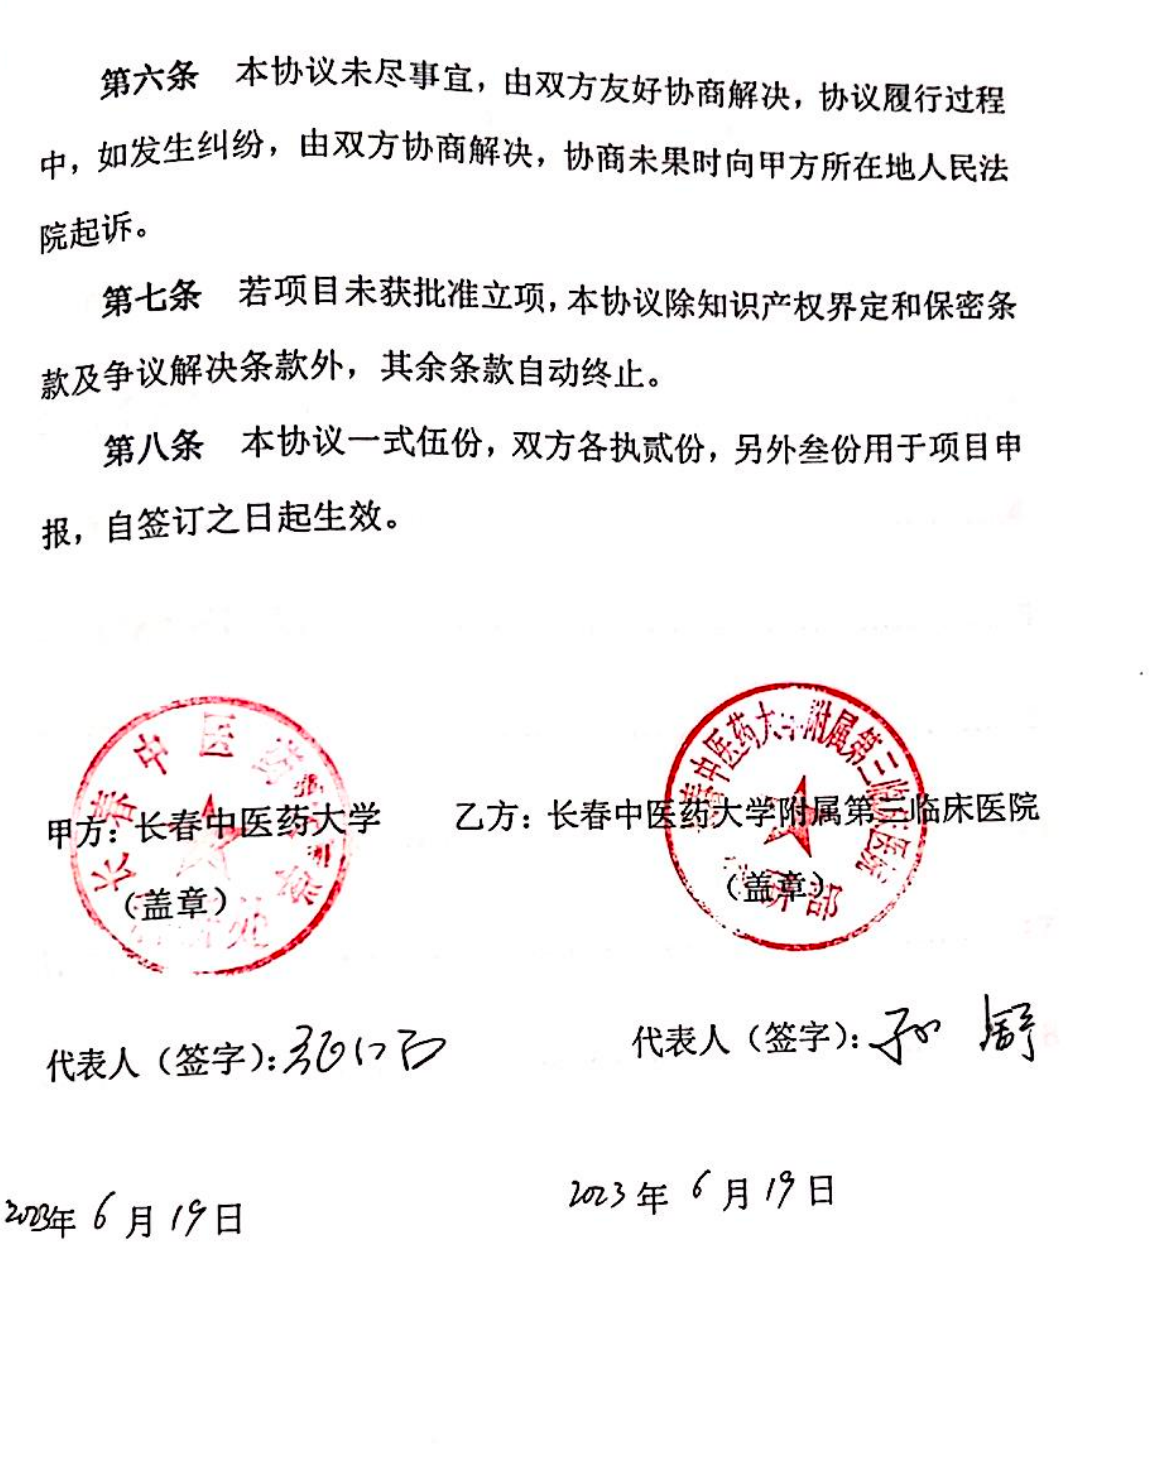


**Funding 2. The National Natural Science Foundation of China (Grant No. 82074569)**


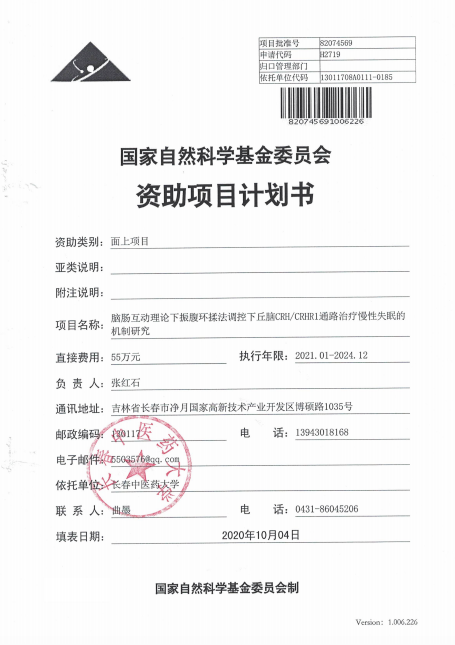


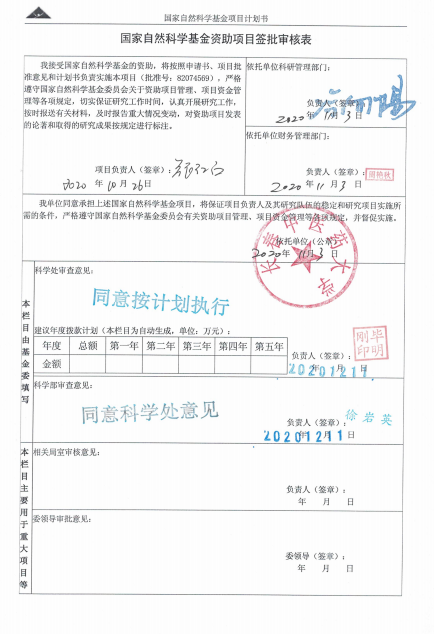


**Funding 3. The National Key R & D Program of China (Grant No. 2018YFC1706002)**


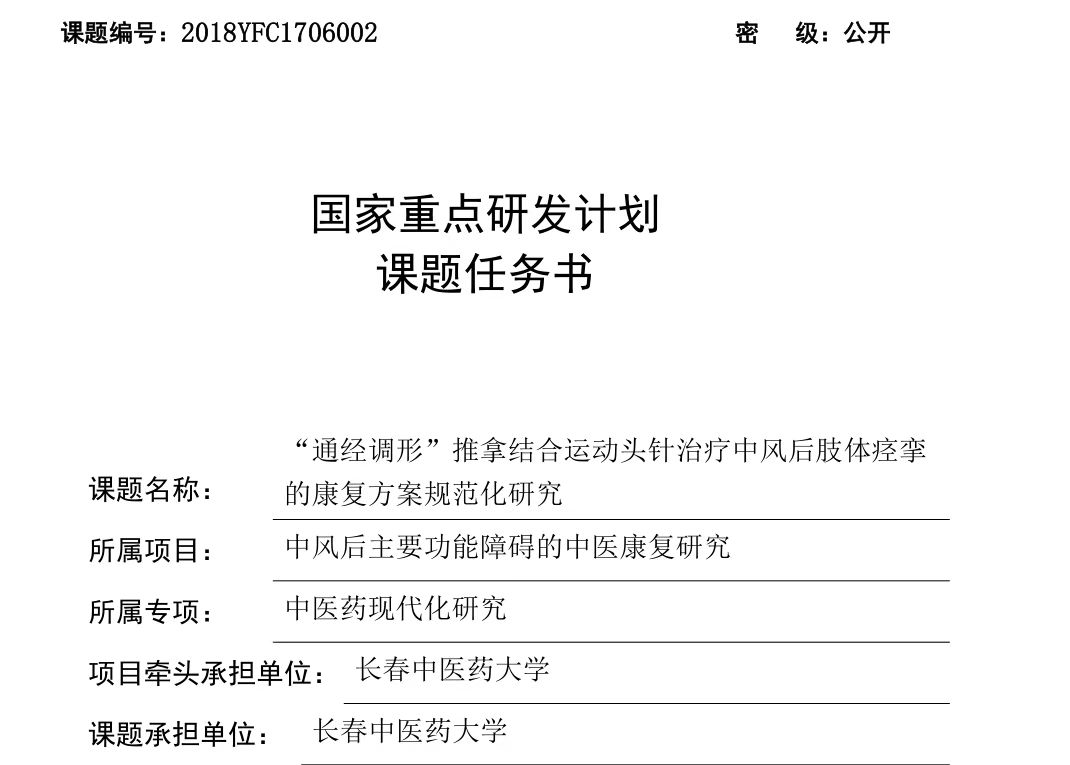


**Ethical approval**


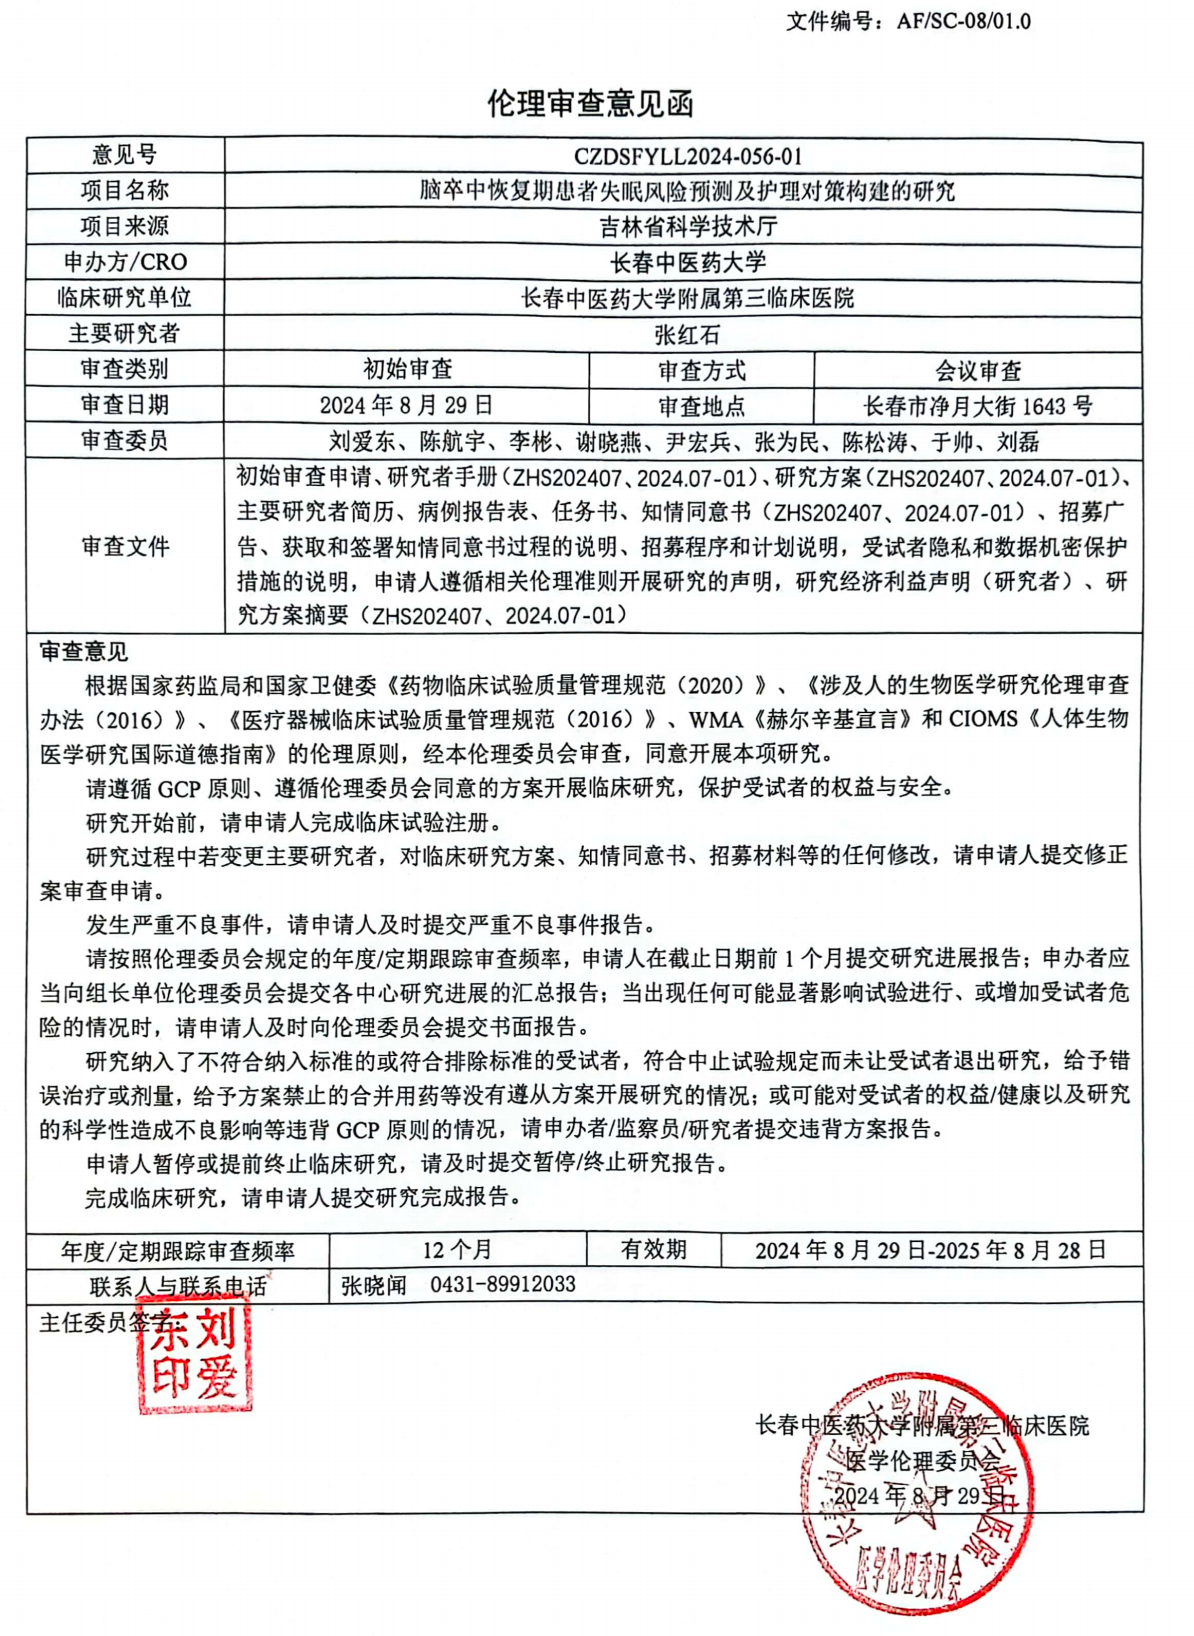

Supplement: Supplementary file 1 [file f089b71491a4678217faad24.docx]
